# Supplementary material
Source: PubMed Central journal article supplement (PMC4836237)
Supplement: JB.00013-16_zjb999094018so1.pdf [file JB.00013-16_zjb999094018so1.pdf]

Figure S1:

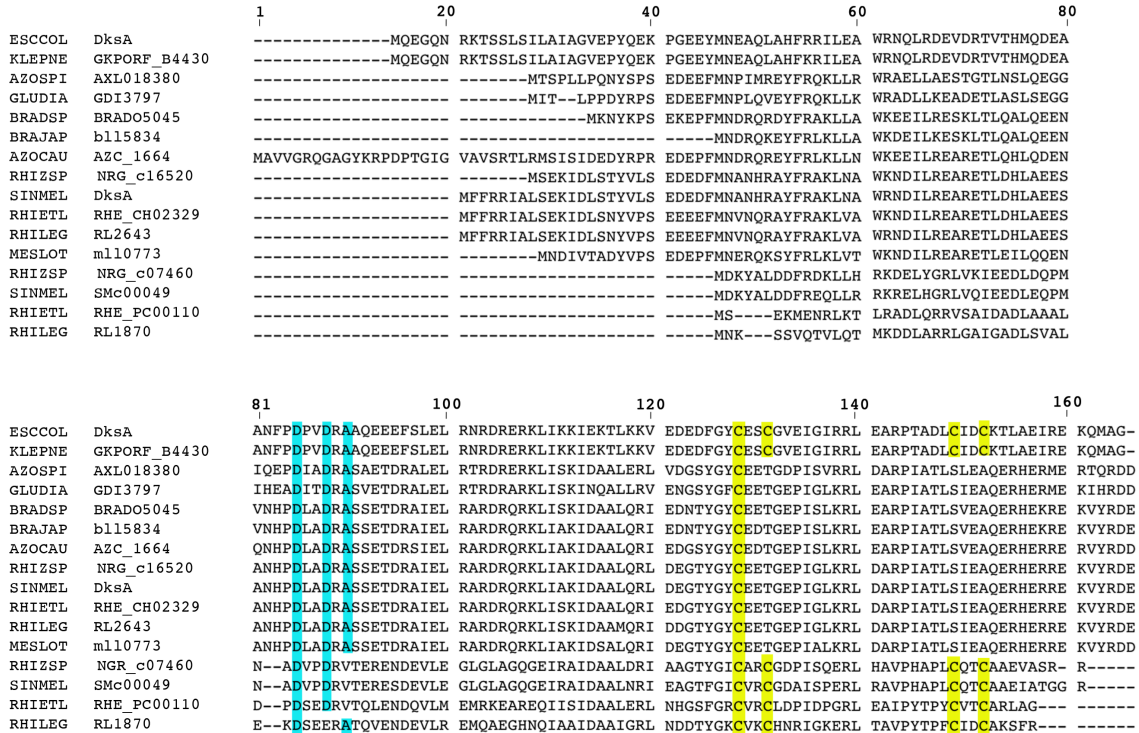

Figure S1: Alignment of DksA orthologs from rhizobia.

DksA-like proteins were identified in various rhizobial genomes by performing a BLAST analysis, using *E. coli* DksA amino acid sequence as query, and searching in genomes available on RhizoBase (<http://genome.microbedb.jp/rhizobase>). A similar search using the key word “TraR” and the search function “InterPro” provided on the website yielded the same hits. Amino acid sequences were aligned using Geneious® version 8.0.3 (<http://www.geneious.com>, Kearse *et al.*, 2012). DxxDxA motifs are highlighted in blue, conserved cysteines of the zinc finger-binding motif are highlighted in yellow. The notation next to the species name is the corresponding gene code or name.

AZOCAU, *Azorhizobium caulinodans* ORS571; AZOSPI, *Azospirillum* sp. B510; BRADSP, *Bradyrhizobium* sp. ORS278; BRAJAP, *Bradyrhizobium japonicum* USDA110; ESCCOL, *Escherichia coli*; GLUDIA, *Gluconacetobacter diazotrophicus*

PAI5; KLEPNE, *Klebsiella pneumoniae* Kp342; MESLOT, *Mesorhizobium loti* MAFF303099; RHIZSP, *Rhizobium* sp. NGR234; RHIETL, *Rhizobium etli* CFN42; RHILEG, *Rhizobium leguminosarum* bv. *viciae* 3841; SINMEL, *Sinorhizobium meliloti* Rm1021.

Figure S2:

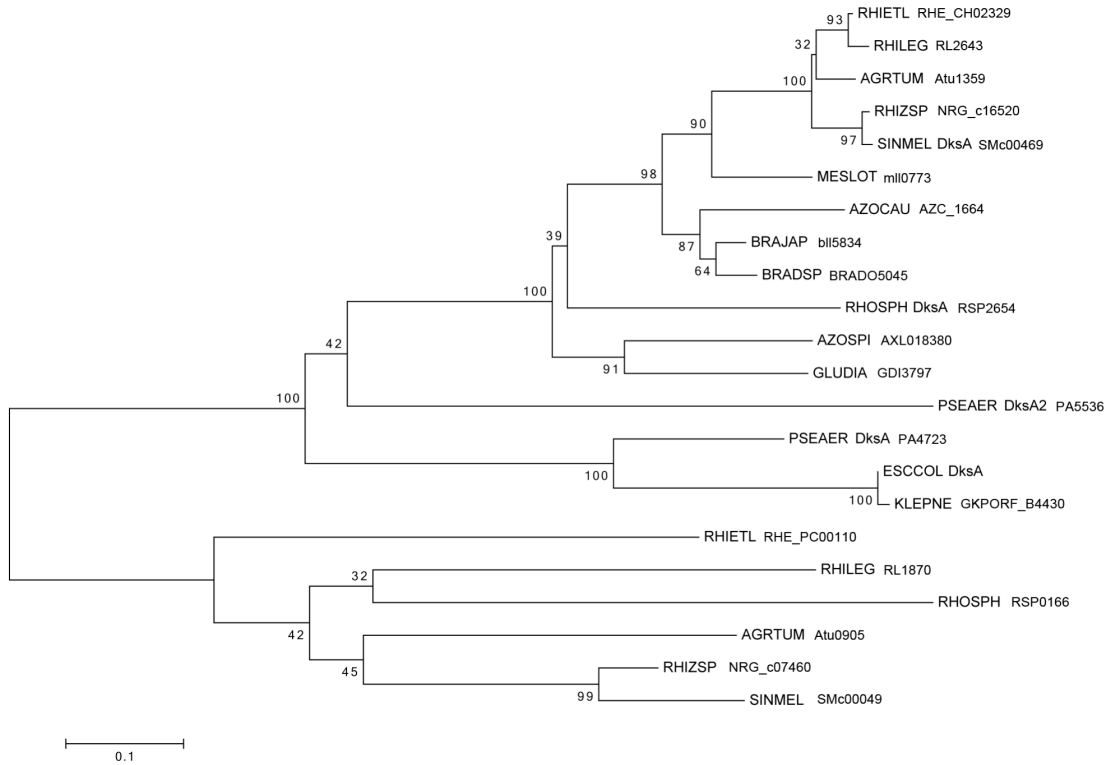

**Figure S2: Phylogenetic tree of DksA-like proteins.**

Protein sequences were obtained from NCBI or Rhizobase (<http://genome.microbedb.jp/rhizobase>) and aligned using the ClustalW algorithm in Geneious® version 8.0.3 (<http://www.geneious.com>, (1)). The phylogenetic tree was calculated using the Neighbor Joining method in MEGA 6.06 (2). Bootstrap values at tree nodes are shown as percentage of 1000 replicates. The branch lengths are proportional to the number of substitutions per site.

AGRTUM, *Agrobacterium tumefaciens* C58; AZOCAU, *Azorhizobium caulinodans* ORS571; AZOSPI, *Azospirillum* sp. B510; BRADSP, *Bradyrhizobium* sp. ORS278; BRAJAP, *Bradyrhizobium japonicum* USDA110; ESCCOL, *Escherichia coli*; GLUDIA, *Gluconacetobacter diazotrophicus* PAI5; KLEPNE, *Klebsiella pneumoniae* Kp342; MESLOT, *Mesorhizobium loti* MAFF303099; PSEAER, *Pseudomonas aeruginosa*;

RHIZSP, *Rhizobium* sp. NGR234; RHIETL, *Rhizobium etli* CFN42; RHILEG, *Rhizobium leguminosarum* bv. viciae 3841; RHOSPH, *Rhodobacter sphaeroides*; SINMEL, *Sinorhizobium meliloti* Rm1021.

Figure S3:

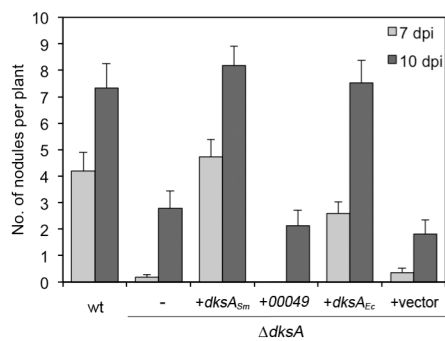

**Figure S3: *E. coli dksA* complements the symbiotic phenotype of the *S. meliloti dksA* mutant.**

Number of nodules on *M. sativa* plants infected with the indicated strains. Expressing *E. coli dksA* from *trpp* in the *S. meliloti*  $\Delta dksA$  background (+*dksA*<sub>Ec</sub>) restores wt nodulation, whereas *S. meliloti* SMc00049 (+00049) does not. Error bars: standard error (n=20).

Figure S4:

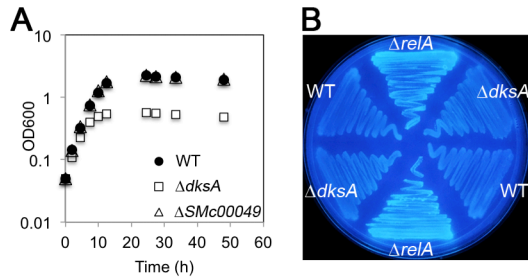

**Figure S4: Phenotypes of  $\Delta dksA$  and  $\Delta relA$ .**

**A.** Growth curves of WT,  $\Delta dksA$ , and  $\Delta SMc00049$  in rich medium (LB) at 37°C; OD<sub>600</sub> values were measured at the indicated time points with a standard spectrophotometer.

**B.** Growth of WT,  $\Delta dksA$ , and  $\Delta relA$  on LB plates supplemented with 0.02% calcofluor white. Bright fluorescence of  $\Delta relA$  strains indicates succinoglycan overproduction.

Figure S5:

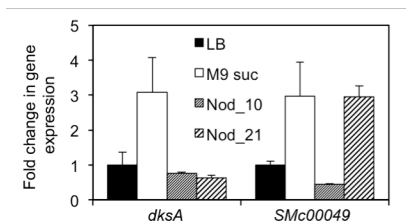

**Figure S5: Expression levels of *dksA* and *SMc00049* and *nod* gene expression in  $\Delta dksA$ .**

Expression of *dksA* and *SMc00049* in wt *S. meliloti* strain CL150 grown in liquid LB or M9 sucrose medium and in 10 or 21 days-old nodules formed on *M. sativa* plants infected with CL150. Transcript abundance was examined by qPCR. Expression was normalized to *pdhB* and is relative to transcript levels in LB medium. Error bars: standard deviation (n=3).

**TABLE S1:** Strains and plasmids used in this study<sup>a</sup>

| Strain or plasmid         | Relevant characteristics                                                                             | Source or reference |
|---------------------------|------------------------------------------------------------------------------------------------------|---------------------|
| <b><i>S. meliloti</i></b> |                                                                                                      |                     |
| Rm1021                    | wild type strain; SU47 Sm <sup>R</sup>                                                               | 3                   |
| CL150                     | modified Rm1021 (progenitor to all strains listed below); Sm <sup>R</sup>                            | 4                   |
| KW201                     | CL150; $\Delta dksA$ ; Sm <sup>R</sup>                                                               | This work           |
| KW202                     | CL150; $\Delta SMc00049$ ; Sm <sup>R</sup>                                                           | This work           |
| KW203                     | CL150; $\Delta relA$ ; Sm <sup>R</sup>                                                               | This work           |
| KW234                     | CL150; $\Delta dksA \Delta SMc00049$ ; Sm <sup>R</sup>                                               | This work           |
| KW235                     | CL150; $\Delta dksA \Delta relA$ ; Sm <sup>R</sup>                                                   | This work           |
| KW236                     | CL150; $\Delta SMc00049 \Delta relA$ ; Sm <sup>R</sup>                                               | This work           |
| KW237                     | CL150; $\Delta dksA \Delta SMc00049 \Delta relA$ ; Sm <sup>R</sup>                                   | This work           |
| KW244                     | KW201; pKW224 ( <i>trpp-dksA</i> ); Sm <sup>R</sup> , Tc <sup>R</sup>                                | This work           |
| KW245                     | KW201; pKW225 ( <i>trpp-SMc00049</i> ); Sm <sup>R</sup> , Tc <sup>R</sup>                            | This work           |
| KW246                     | KW201; pKW226 ( <i>trpp-dksA<sub>Ec</sub></i> ); Sm <sup>R</sup> , Tc <sup>R</sup>                   | This work           |
| KW247                     | KW201; pKW227 ( <i>dksAp-dksA</i> ); Sm <sup>R</sup> , Tc <sup>R</sup>                               | This work           |
| KW248                     | KW201; pKW228 ( <i>SMc00049p-SMc00049</i> ); Sm <sup>R</sup> , Tc <sup>R</sup>                       | This work           |
| KW249                     | KW201; pKW229 ( <i>SMc00048p-SMc00048-SMc00049</i> ); Sm <sup>R</sup> , Tc <sup>R</sup>              | This work           |
| KW250                     | KW201; pDW76 (empty vector); Sm <sup>R</sup> , Tc <sup>R</sup>                                       | This work           |
| KW251                     | KW203; pKW224 ( <i>trpp-dksA</i> ); Sm <sup>R</sup> , Tc <sup>R</sup>                                | This work           |
| KW279                     | KW201; pKW236 ( <i>trpp-dksA A70T</i> ); Sm <sup>R</sup> , Tc <sup>R</sup>                           | This work           |
| KW280                     | KW201; pKW237 ( <i>trpp-SMc00049 V43A</i> ); Sm <sup>R</sup> , Tc <sup>R</sup>                       | This work           |
| KW281                     | KW201; pKW238 ( <i>trpp-dksA DDV</i> ); Sm <sup>R</sup> , Tc <sup>R</sup>                            | This work           |
| KW282                     | KW201; pKW239 ( <i>trpp-SMc00049 DDA</i> ); Sm <sup>R</sup> , Tc <sup>R</sup>                        | This work           |
| KW307                     | KW201; pKW245 ( <i>trpp-SMc00049 N1</i> ); Sm <sup>R</sup> , Tc <sup>R</sup>                         | This work           |
| KW308                     | KW201; pKW246 ( <i>trpp-SMc00049 N2</i> ); Sm <sup>R</sup> , Tc <sup>R</sup>                         | This work           |
| KW309                     | KW201; pKW247 ( <i>trpp-SMc00049 V43A N1</i> ); Sm <sup>R</sup> , Tc <sup>R</sup>                    | This work           |
| KW310                     | KW201; pKW248 ( <i>trpp-SMc00049 V43A N2</i> ); Sm <sup>R</sup> , Tc <sup>R</sup>                    | This work           |
| KW311                     | KW201; pKW249 ( <i>trpp-SMc00049 DDA N1</i> ); Sm <sup>R</sup> , Tc <sup>R</sup>                     | This work           |
| KW320                     | KW201; pKW244 ( <i>trpp-dksA <math>\Delta</math>N</i> ); Sm <sup>R</sup> , Tc <sup>R</sup>           | This work           |
| KW328                     | CL150; pRF771 (empty vector); Sm <sup>R</sup> , Tc <sup>R</sup>                                      | This work           |
| <b><i>E. coli</i></b>     |                                                                                                      |                     |
| DH5 $\alpha$              | cloning strain                                                                                       | 5                   |
| B001                      | DH5 $\alpha$ harbouring helper plasmid pRK600                                                        | 6                   |
| RLG4996                   | wild type strain                                                                                     | 7                   |
| RLG6348                   | RLG4996; $\Delta dksA_{Ec}$ ; Tc <sup>R</sup>                                                        | 7                   |
| KW222                     | RLG6348 carrying pKW222 ( <i>lppp-dksA</i> ); Ap <sup>R</sup> , Tc <sup>R</sup>                      | This work           |
| KW223                     | RLG6348 carrying pKW223 ( <i>lppp-SMc00049</i> ); Ap <sup>R</sup> , Tc <sup>R</sup>                  | This work           |
| KW224                     | RLG6348 carrying pRLG6333 ( <i>lppp-dksA<sub>Ec</sub></i> ); Ap <sup>R</sup> , Tc <sup>R</sup>       | This work           |
| KW225                     | RLG6348 carrying pINIIIA1 (empty vector); Ap <sup>R</sup> , Tc <sup>R</sup>                          | This work           |
| KW226                     | RLG4996 carrying pKW222 ( <i>lppp-dksA</i> ); Ap <sup>R</sup>                                        | This work           |
| KW227                     | RLG4996 carrying pKW223 ( <i>lppp-SMc00049</i> ); Ap <sup>R</sup>                                    | This work           |
| KW228                     | RLG4996 carrying pRLG6333 ( <i>lppp-dksA<sub>Ec</sub></i> ); Ap <sup>R</sup>                         | This work           |
| KW229                     | RLG4996 carrying pINIIIA1 (empty vector); Ap <sup>R</sup>                                            | This work           |
| KW267                     | RLG6348 carrying pKW240 ( <i>lppp-dksA A70T</i> ); Ap <sup>R</sup> , Tc <sup>R</sup>                 | This work           |
| KW268                     | RLG6348 carrying pKW241 ( <i>lppp-SMc00049 V43A</i> ); Ap <sup>R</sup> , Tc <sup>R</sup>             | This work           |
| KW269                     | RLG6348 carrying pKW242 ( <i>lppp-dksA DDV</i> ); Ap <sup>R</sup> , Tc <sup>R</sup>                  | This work           |
| KW270                     | RLG6348 carrying pKW243 ( <i>lppp-SMc00049 DDA</i> ); Ap <sup>R</sup> , Tc <sup>R</sup>              | This work           |
| KW291                     | RLG6348 carrying pKW251 ( <i>lppp-SMc00049 N1</i> ); Ap <sup>R</sup> , Tc <sup>R</sup>               | This work           |
| KW292                     | RLG6348 carrying pKW252 ( <i>lppp-SMc00049 N2</i> ); Ap <sup>R</sup> , Tc <sup>R</sup>               | This work           |
| KW293                     | RLG6348 carrying pKW253 ( <i>lppp-SMc00049 V43A N1</i> ); Ap <sup>R</sup> , Tc <sup>R</sup>          | This work           |
| KW294                     | RLG6348 carrying pKW254 ( <i>lppp-SMc00049 V43A N2</i> ); Ap <sup>R</sup> , Tc <sup>R</sup>          | This work           |
| KW295                     | RLG6348 carrying pKW255 ( <i>lppp-SMc00049 DDA N1</i> ); Ap <sup>R</sup> , Tc <sup>R</sup>           | This work           |
| KW321                     | RLG6348 carrying pKW257 ( <i>lppp-dksA <math>\Delta</math>N</i> ); Ap <sup>R</sup> , Tc <sup>R</sup> | This work           |

**Plasmids**

|          |                                                                                     |                           |
|----------|-------------------------------------------------------------------------------------|---------------------------|
| pJQ200SK | suicide vector for construction of deletions; <i>sacB</i> ; Gm <sup>R</sup>         | 8                         |
| pHIs364  | pJQ200SK; <i>ccdB</i> lethal gene; Gm <sup>R</sup>                                  | H. Ichida,<br>unpublished |
| pRF771   | vector for <i>trpp</i> transcriptional fusions; Tc <sup>R</sup>                     | 9                         |
| pDW76    | pRF771, <i>trpp</i> removed; Tc <sup>R</sup>                                        | 9                         |
| pINIIIA1 | <i>E. coli</i> vector for <i>lppp</i> transcriptional fusions; Ap <sup>R</sup>      | 10                        |
| pKW201   | pHIs364 derivative, <i>dksA</i> upstream + downstream sequence; Gm <sup>R</sup>     | This work                 |
| pKW202   | pHIs364 derivative, <i>SMc00049</i> upstream + downstream sequence; Gm <sup>R</sup> | This work                 |
| pKW203   | pHIs364 derivative, <i>relA</i> upstream + downstream sequence; Gm <sup>R</sup>     | This work                 |
| pKW222   | pINIIIA1 derivative; <i>lppp-dksA</i> ; Ap <sup>R</sup>                             | This work                 |
| pKW223   | pINIIIA1 derivative; <i>lppp-SMc00049</i> ; Ap <sup>R</sup>                         | This work                 |
| pKW224   | pRF771 derivative; <i>trpp-dksA</i> ; Tc <sup>R</sup>                               | This work                 |
| pKW225   | pRF771 derivative; <i>trpp-SMc00049</i> ; Tc <sup>R</sup>                           | This work                 |
| pKW226   | pRF771 derivative; <i>trpp-dksA<sub>Ec</sub></i> ; Tc <sup>R</sup>                  | This work                 |
| pKW227   | pDW76 derivative; <i>dksAp-dksA</i> ; Tc <sup>R</sup>                               | This work                 |
| pKW228   | pDW76 derivative; <i>SMc00049p-SMc00049</i> ; Tc <sup>R</sup>                       | This work                 |
| pKW229   | pDW76 derivative; <i>SMc00048p-SMc00048-SMc00049</i> ; Tc <sup>R</sup>              | This work                 |
| pKW236   | pRF771 derivative; <i>trpp-dksA</i> A70T; Tc <sup>R</sup>                           | This work                 |
| pKW237   | pRF771 derivative; <i>trpp-SMc00049</i> V43A; Tc <sup>R</sup>                       | This work                 |
| pKW238   | pRF771 derivative; <i>trpp-dksA</i> DDV; Tc <sup>R</sup>                            | This work                 |
| pKW239   | pRF771 derivative; <i>trpp-SMc00049</i> DDA; Tc <sup>R</sup>                        | This work                 |
| pKW240   | pINIIIA1 derivative; <i>lppp-dksA</i> A70T; Ap <sup>R</sup>                         | This work                 |
| pKW241   | pINIIIA1 derivative; <i>lppp-SMc00049</i> V43A; Ap <sup>R</sup>                     | This work                 |
| pKW242   | pINIIIA1 derivative; <i>lppp-dksA</i> DDV; Ap <sup>R</sup>                          | This work                 |
| pKW243   | pINIIIA1 derivative; <i>lppp-SMc00049</i> DDA; Ap <sup>R</sup>                      | This work                 |
| pKW244   | pRF771 derivative; <i>trpp-dksA</i> ΔN; Tc <sup>R</sup>                             | This work                 |
| pKW245   | pRF771 derivative; <i>trpp-SMc00049</i> N1; Tc <sup>R</sup>                         | This work                 |
| pKW246   | pRF771 derivative; <i>trpp-SMc00049</i> N2; Tc <sup>R</sup>                         | This work                 |
| pKW247   | pRF771 derivative; <i>trpp-SMc00049</i> V43A N1; Tc <sup>R</sup>                    | This work                 |
| pKW248   | pRF771 derivative; <i>trpp-SMc00049</i> V43A N2; Tc <sup>R</sup>                    | This work                 |
| pKW249   | pRF771 derivative; <i>trpp-SMc00049</i> DDA N1; Tc <sup>R</sup>                     | This work                 |
| pKW251   | pINIIIA1 derivative; <i>lppp-SMc00049</i> N1; Ap <sup>R</sup>                       | This work                 |
| pKW252   | pINIIIA1 derivative; <i>lppp-SMc00049</i> N2; Ap <sup>R</sup>                       | This work                 |
| pKW253   | pINIIIA1 derivative; <i>lppp-SMc00049</i> V43A N1; Ap <sup>R</sup>                  | This work                 |
| pKW254   | pINIIIA1 derivative; <i>lppp-SMc00049</i> V43A N2; Ap <sup>R</sup>                  | This work                 |
| pKW255   | pINIIIA1 derivative; <i>lppp-SMc00049</i> DDA N1; Ap <sup>R</sup>                   | This work                 |
| pKW257   | pINIIIA1 derivative; <i>lppp-dksA</i> ΔN; Ap <sup>R</sup>                           | This work                 |
| pRLG6333 | pINIIIA1 derivative encoding <i>dksA<sub>Ec</sub></i> ; Ap <sup>R</sup>             | 7                         |

---

a Abbreviations of antibiotics: Ap, ampicillin; Gm, gentamicin; Sm, streptomycin; Tc, tetracycline.

**TABLE S2:** Oligonucleotides used in this study.**Primer sequences for construction of deletion mutants:**

| Gene           | forward primer | sequence 5'-3'                 | reverse primer | sequence 5'-3'                                    | amplified sequence |
|----------------|----------------|--------------------------------|----------------|---------------------------------------------------|--------------------|
| <i>dksA</i>    | KWn013         | GTCCCGGTATAGAGTGTGTC<br>GAG    | KWn014b        | CTACTCGAGCATCTCATTGCGGC                           | upstream of ORF    |
|                | KWn015b        | GAACTCGAGTAAGTCCGGGGA<br>C     | KWn016         | GACCCGGGACACCTGATCATGATC                          | downstream of ORF  |
| <i>SMc0049</i> | KWn005         | GAATTCCTGCAGCCCGAAAA<br>GGAC   | KWn006         | TTATCTTTATCCATTGCGTGAC<br>ACTAGTGGATCCCCCTGCAGGAA | upstream of ORF    |
|                | KWn007         | ATGGATAAGAGATAACCACCC<br>AAAGC | KWn008         | AG                                                | downstream of ORF  |
| <i>relA</i>    | KWn021         | GTCCCGGTTTATCATGCTCCG<br>C     | KWn022         | CTGAATTCGCGCATCATCCGCTAG                          | upstream of ORF    |
|                | KWn023         | GTGAATTCTAGGGCGCTGTT<br>CG     | KWn024         | GTCCCGGAACAAAGACCTTGCC                            | downstream of ORF  |

**Primer sequences for confirmation of deletions:**

| Gene            | forward primer | sequence 5'-3'              | reverse primer | sequence 5'-3'         |
|-----------------|----------------|-----------------------------|----------------|------------------------|
| <i>dksA</i>     | KWn038         | CGAAAGAGCTCCTCCATCATC<br>G  | KWn039         | GCGATCGGTCTCTTGTGCC    |
| <i>SMc00049</i> | KWn025         | GGTCACTTTGATCCAAGTCAA<br>GG | KWn068         | GGAGGCACTTCATGGCGATGC  |
| <i>relA</i>     | KWn027         | GCTGCAGTTCGTCCACATTTTC      | KWn069         | GCAAACCCCTTTCGTTACCTCC |

**Primer sequences for construction of *S. meliloti*  $\Delta dksA$  complementation plasmids:**

| Promoter-Genes            | forward primer | sequence 5'-3'                 | reverse primer | sequence 5'-3'             | backbone vector |
|---------------------------|----------------|--------------------------------|----------------|----------------------------|-----------------|
| <i>trpp-dksA</i>          | KWn056         | GTTCTAGACACCGCCGAATG<br>AGATG  | KWn062         | CTGGATCCTTATTCGTCCC GG TAG | pRF771          |
| <i>dksAp-dksA</i>         | KWn064         | CATCTAGACGTGCTCGCCCAT<br>GG    | KWn062         | CTGGATCCTTATTCGTCCC GG TAG | pDW76           |
| <i>trpp-SMc00049</i>      | KWn058         | CCTCTAGACGAAGGAGTCACG<br>CAATG | KWn063         | CTGGATCCTTATCTCCCCCGGTC    | pRF771          |
| <i>SMc00049p-SMc00049</i> | KWn065         | CATCTAGACGTGCAAATCCGC<br>ACCG  | KWn063         | CTGGATCCTTATCTCCCCCGGTC    | pDW76           |
| <i>SMc00048p-SMc00049</i> | KWn066         | GCTCTAGACTGCTGCCCAATT<br>C     | KWn063         | CTGGATCCTTATCTCCCCCGGTC    | pDW76           |



**Primer sequences for construction of *E. coli*  $\Delta dksA$  complementation plasmids:**

| Gene            | forward primer | sequence 5'-3'                 | reverse primer | sequence 5'-3'                                        | backbone vector |
|-----------------|----------------|--------------------------------|----------------|-------------------------------------------------------|-----------------|
| <i>dksA</i>     | KWn056         | GTTCTAGACACCGCCGCAATG<br>AGATG | KWn057         | CCTAAGCTTTCCCCGGACTTATTCG<br>CTAAGCTTTTATCTCCCCCGGTCG | pIN111A1        |
| <i>SMc00049</i> | KWn058         | CCTCTAGACGAAGGAGTCACG<br>CAATG | KWn059         | C                                                     | pIN111A1        |

**Primer sequences for construction of amino acid substitution mutants and chimeras for expression in *S. meliloti* (overlap extension PCR), backbone vector pRF771:**

| gene variant            | forward primer 1 | sequence 5'-3'                         | reverse primer 1 | sequence 5'-3'                         | forward primer 2 | sequence 5'-3'                         | reverse primer 2 | sequence 5'-3'               |
|-------------------------|------------------|----------------------------------------|------------------|----------------------------------------|------------------|----------------------------------------|------------------|------------------------------|
| <i>dksA</i> A70T        | KWn056           | GTTCTAGACACCGCCGCAATG<br>AGATG         | KWn082           | GGATGAGGTGCGGTCCGCAAGATC<br>AGGATGATTG | KWn083           | CAATCATCCTGATCTTGC<br>GGACCGCACCTCATCC | KWn062           | CTGGATCCTTATT<br>CGTCCCGGTAG |
| <i>dksA</i> DDV         | KWn056           | GTTCTAGACACCGCCGCAATG<br>AGATG         | KWn089           | GGATGATACGCGATCCGGCACATC<br>AGGATGATTG | KWn090           | CAATCATCCTGATGTGCC<br>GGATCGCGTATCATCC | KWn062           | CTGGATCCTTATT<br>CGTCCCGGTAG |
| <i>SMc00049</i><br>V43A | KWn058           | CCTCTAGACGAAGGAGTCACG<br>CAATG         | KWn086           | TTCCGTGGCGCGATCCGGCACATC<br>GGCATTATC  | KWn087           | GATGAATGCCGATGTGCC<br>GGATCGCGCCACGGAA | KWn063           | CTGGATCCTTATC<br>TCCCCCGGTC  |
| <i>SMc00049</i> DDA     | KWn058           | CCTCTAGACGAAGGAGTCACG<br>CAATG         | KWn091           | TTCCGTGGCGCGGTCCGCAAGATC<br>GGCATTATC  | KWn092           | GATGAATGCCGATCTTGC<br>GGACCGCGCCACGGAA | KWn063           | CTGGATCCTTATC<br>TCCCCCGGTC  |
| <i>SMc00049</i> N1      | KWn058           | CCTCTAGACGAAGGAGTCACG<br>CAATG         | KWn093           | CAAGCGCATACTTATCAAAATCCT<br>CGTCTC     | KWn094           | GAGGACGAGGATTTTGAT<br>AAGTATGCGCTTG    | KWn063           | CTGGATCCTTATC<br>TCCCCCGGTC  |
| <i>SMc00049</i> N2      | KWn058           | CCTCTAGACGAAGGAGTCACG<br>CAATG         | KWn095           | GCTGTTGCGGAAAGTATGCCCGGT<br>GGTTC      | KWn096           | GAACCACGGGCATACTT<br>TCGCGAACAGC       | KWn063           | CTGGATCCTTATC<br>TCCCCCGGTC  |
| <i>dksA</i> $\Delta$ N  | KWn097           | GTTCTAGACCGCAATGAGATG<br>AATGCGAACCACC | -                | -                                      | -                | -                                      | KWn062           | CTGGATCCTTATT<br>CGTCCCGGTAG |

**Primer sequences for construction of amino acid substitution mutants and chimeras for expression in *E. coli* (overlap extension PCR), backbone vector pIN111A1:**

The same reverse 1 and forward 2 primers were used as for the *S. meliloti* constructs, and forward 1 and reverse 2 were the same as forward and reverse primers for the *E. coli* complementation constructs.

**Primer sequences for qPCR :**

| Gene            | forward primer | sequence 5'-3'       | reverse primer | sequence 5'-3'       |
|-----------------|----------------|----------------------|----------------|----------------------|
| <i>dksA</i>     | KWn070         | TTATGAATGCGAACCACCGG | KWn071         | TCAGGATGATTGGCGCTCTC |
| <i>SMc00049</i> | KWn072         | CAGCCGATGAATGCCGATG  | KWn073         | CGAAGGTTCTGCTTCGATG  |
| <i>pdhB</i>     | pdhB-Fwd       | GCTCTCCAAGTGGCTGAAGA | pdhB-Rev       | CTACCGCTTCCACTTCCATC |

## References:

1. **Kearse M, Moir R, Wilson A, Stones-Havas S, Cheung M, Sturrock S, Buxton S, Cooper A, Markowitz S, Duran C, Thierer T, Ashton B, Meintjes P, Drummond A.** 2012. Geneious Basic: an integrated and extendable desktop software platform for the organization and analysis of sequence data. *Bioinformatics* **28**:1647-1649.
2. **Tamura K, Stecher G, Peterson D, Filipinski A, Kumar S.** 2013. MEGA6: Molecular Evolutionary Genetics Analysis version 6.0. *Mol Biol Evol* **30**:2725-2729.
3. **Meade HM, Long SR, Ruvkun GB, Brown SE, Ausubel FM.** 1982. Physical and genetic characterization of symbiotic and auxotrophic mutants of *Rhizobium meliloti* induced by transposon Tn5 mutagenesis. *J Bacteriol* **149**:114-122.
4. **Schlüter JP, Reinkensmeier J, Barnett MJ, Lang C, Krol E, Giegerich R, Long SR, Becker A.** 2013. Global mapping of transcription start sites and promoter motifs in the symbiotic alpha-proteobacterium *Sinorhizobium meliloti* 1021. *BMC Genomics* **14**:156.
5. **Hanahan D.** 1983. Studies on transformation of *Escherichia coli* with plasmids. *J Mol Biol* **166**:557-580.
6. **Griffitts JS, Carlyon RE, Erickson JH, Moulton JL, Barnett MJ, Toman CJ, Long SR.** 2008. A *Sinorhizobium meliloti* osmosensory two-component system required for cyclic glucan export and symbiosis. *Mol Microbiol* **69**:479-490.
7. **Paul BJ, Barker MM, Ross W, Schneider DA, Webb C, Foster JW, Gourse RL.** 2004. DksA: a critical component of the transcription initiation machinery that potentiates the regulation of rRNA promoters by ppGpp and the initiating NTP. *Cell* **118**:311-322.
8. **Quandt J, Hynes MF.** 1993. Versatile suicide vectors which allow direct selection for gene replacement in gram-negative bacteria. *Gene* **127**:15-21.
9. **Wells DH, Long SR.** 2002. The *Sinorhizobium meliloti* stringent response affects multiple aspects of symbiosis. *Mol Microbiol* **43**:1115-1127.
10. **Masui Y, Mizuno T, Inouye M.** 1984. Novel high-level expression cloning vehicles: 104-fold amplification of *Escherichia coli* minor protein. *Nat Biotechnol* **2**:81-85.
